# Supplementary material
Source: Springer Nature journal article supplement (https://www.springermedizin.de/resource/supplementary/12936_2010_1684_MOESM3_ESM.pdf/9541530)

Average *An. gambiae* and  
*An. funestus* per trap per 100 nights

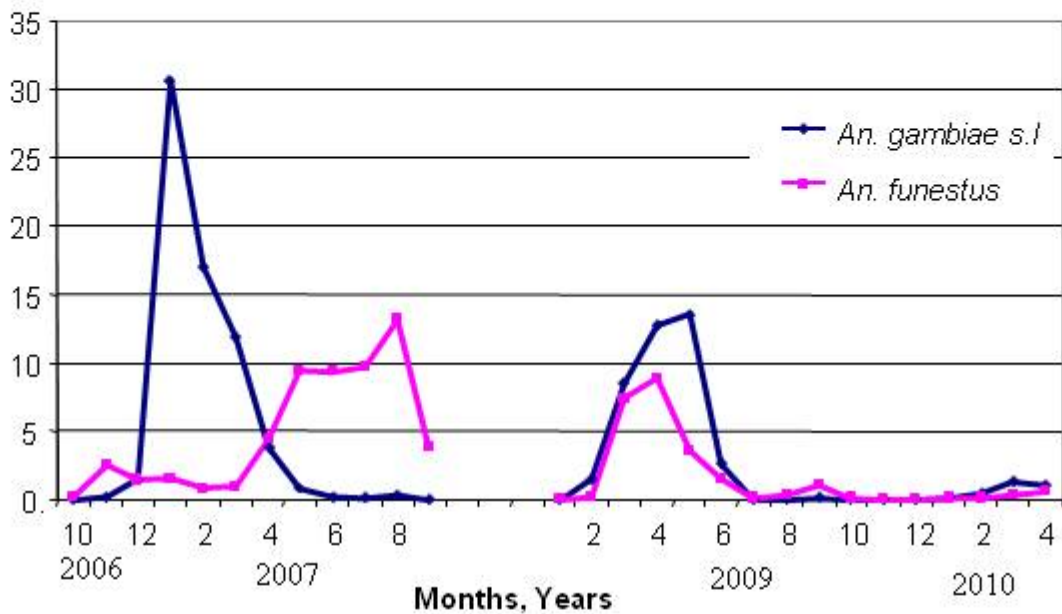

Supplement: MOESM3 [file 9541530]
